# Supplementary material for: Cell sorting by deterministic cell rolling
Source: Royal Society of Chemistry journal article supplement (doi:10.1039/c2lc21225k), 2012-01-01
Supplement: c2lc21225k.pdf [file c2lc21225k.pdf]

# Cell sorting by deterministic cell rolling

Sungyoung Choi, Jeffrey M. Karp and Rohit Karnik

## I. Supplemental Materials and Methods

### Materials

Recombinant human P-selectin (sP-selectin monomer) was purchased from R&D Systems (Minneapolis, MN). Human promyelocytic leukemia cell line (HL60) and human chronic myelogenous leukemia cell line (K562), Iscove's modified Dulbecco's medium (IMDM), and fetal bovine serum (FBS) were obtained from American Type Culture Collection (ATCC, Manassas, VA). Dulbecco's phosphate-buffered saline (DPBS) was supplied by Mediatech Inc. (Manassas, VA). All other materials were obtained from Invitrogen Inc. (Carlsbad, CA) and Sigma-Aldrich (St. Louis, MO), unless specified.

### Cell culture and characterization

HL60 and K562 cells were cultured in IMDM supplemented with 20% FBS, 100 U/mL penicillin and 100 µg/mL streptomycin. Cell concentration was maintained between  $10^5$  and  $10^6$  cells/mL. HL60 cells at passages between 10 and 40 were used for experiments. To determine sorting performance (i.e. purity, throughput, and recovery), K562 cells were washed with DPBS and then stained with 5 µM CFDA at 37 °C for 30 min only for separation of mixed samples of HL60 and K562 cells shown in Fig. 4B and 4C. For the experiments in Fig. 4A, K562 cells were used without staining and did not exhibit cell rolling on P-selectin coated ridges. After staining, K562 cells were washed twice with DPBS, and mixed with HL60 cells before each sorting experiment. HL60 cells were normally used without staining. For taking the sorting video (Video S2), HL60 cells were washed with DPBS and then stained with 5 µM CellTracker at 37 °C for 30 min. After staining, the cells were washed twice with DPBS, and mixed with K562 cells. There was no observable difference in cell rolling behavior between stained and unstained HL60 cells, or between stained and unstained K562 cells. The sorted cells were collected separately by using 2.0-mL centrifuge tubes and analyzed with a fluorescence-activated cell sorter (FACS; Accuri Cytometers, Inc., MI). Sorting recovery was calculated as the number of collected target cells in each outlet (HL60 for the outlet A and K562 for the outlet B) divided by the total number of each cell type injected.

### Device fabrication

Microfluidic devices were fabricated in a multilayer structure for scalable parallelization in which multiple sorting layers could be sandwiched between the top injection layer and the bottom collection layer (Fig. S2). Each layer of poly(dimethylsiloxane) (PDMS) was separately cast from microfabricated photoresist molds and then selectively punched to provide fluid interconnections with other layers. The perforated layers were exposed to oxygen plasma for 40 s, and irreversibly assembled by sequentially stacking the collection layer, sorting layers, and the injection layer. This method allows for easy addition of more sorting layers as required. Each sorting layer comprised ten microchannels, each further comprising a focusing and a sorting channel (Fig. S3). The focusing channel had 80 focusing ridges with  $\theta_f = 60^\circ$ ,  $d_f = 35$  µm, and  $g_f = 35$  µm (Fig. S3). The sorting channel comprised 51 sorting ridges with  $d_s = 150$  µm and  $g_s = 150$  µm for  $\theta_s = 20^\circ$ , and with  $d_s = 75$  µm and  $g_s = 75$  µm for  $\theta_s = 45^\circ$  (Fig. S3). The devices with  $\theta_s = 20^\circ$  were used for experiments, unless specified. We tailored the channel gap,  $h_g = 26$  µm to be in the range  $d < h_g < 2.5d$  so that the cell motion and interaction with the ridges can be limited by steric hindrance, where  $d$  is the cell diameter of  $11.7 \pm 1.5$  µm (HL60) and  $14.6 \pm 1.4$  µm (K562).<sup>16</sup>

Master molds for each layer were made by patterning SU8 photoresist (Microchem Corp., Newton, MA). The master mold which contained thick channel features ( $244.8 \pm 30.6$  µm in height) for cell injection and collection was formed on a silicon substrate in single photolithographic process. Two-step photolithographic techniques were used to define two-layered features for cell sorting. The first layer of photolithography defined the main linear-channel structures ( $h_g$ ,  $26.0 \pm 1.0$  µm in depth); the second layer was aligned to lie on top of the channel structures in the first layer and defined the pattern of slant ridges ( $h_s$ ,  $62.6 \pm 2.3$  µm in depth).

The microfluidic conduits in each layer were carefully designed to uniformly distribute and collect cells. The sub-millimeter-scale channels in the injection and collection layers were designed to have negligible pressure drop, and most of the pressure drop occurred through the pressure dump resistors connected to the end of each separation channel (Fig. S3). The pressure drop for a rectangular channel is given by<sup>S1</sup>

$$\Delta P = \frac{a\mu QL}{WH^3}$$

$$a = 12 \left[ 1 - \frac{192H}{\pi^3 W} \tanh\left(\frac{\pi W}{2h}\right) \right]^{-1}$$

where  $W$  is the width of the channel,  $H$  is the height of the channel,  $a$  is a dimensionless parameter that depends on aspect ratio ( $W/H$ ),  $\mu$  is the viscosity,  $Q$  is the volumetric flow rate, and  $L$  is the channel length. The calculated ratio of the pressure drop in the injection and sorting channels to the pressure-dump channels was roughly 1:110, sufficiently high for the fluid to be distributed uniformly through the parallel sorting channels.

Square posts of  $50$  µm  $\times$   $50$  µm, spaced  $50$  µm apart were fabricated in PDMS ( $58.9 \pm 2.0$  µm in depth) to examine the difference in the trajectories of the rolling and non-rolling cells at the corners of the posts.

## Experimental setup

The assembled device was degassed in a vacuum chamber for 20 min, filled with P-selectin solution ( $c_p = 1.5 \mu\text{g/mL}$ , unless specified) by pipetting, and then incubated at room temperature. After 3 h incubation, the device was washed with 1% bovine serum albumin (BSA). The inherent hydrophobicity of PDMS can facilitate protein physisorption although covalent immobilization of P-selectin enhances its functional stability on surface.<sup>S2</sup> Stable, reliable cell rolling for at least 3 h observed in the device shows that selectin physisorption on PDMS substrates is sufficient for proof-of-concept studies.

Cells ( $\sim 1 \times 10^5$  to  $2 \times 10^5$  cells/mL) were flowed into the device at 50 to 110  $\mu\text{L/min}$  using a syringe pump (KD Scientific Inc., Holliston, MA). Cell rolling and sorting were recorded using a high-speed camera (EX-F1; CASIO, Japan) mounted on inverted microscopes (TE2000-U and TS100; Nikon, Japan). Visualization of flow patterns was performed using streak images of 1- $\mu\text{m}$  diameter fluorescent polystyrene beads (Invitrogen Inc.), which were estimated to have negligible inertial effects (particle Reynolds number  $\sim 10^{-4}$ ) under the device operating conditions. Particles flowing near either the top or bottom surface of a sorting channel could be discerned by adjusting the focal plane of the objective.

## Numerical simulation

Flow simulations were performed to calculate the maximum shear stress on the slant ridges where cells can tether and roll, and to visualize streamlines in the channels. Commercial finite element analysis software (COMSOL Multiphysics 3.4) was used to solve three-dimensional models (focusing and sorting channels) in the "Incompressible Navier-Stokes Mode." No-slip boundary conditions were applied at the channel walls. The velocity at the inlet was set to have a parabolic profile and the pressure at the outlet was set to zero. The channel for simulation was 670  $\mu\text{m}$  in width and 63  $\mu\text{m}$  in depth with a gap between the top surfaces of the SR and the channel,  $h_g = 26 \mu\text{m}$ , a ridge interval,  $g_s = 150 \mu\text{m}$ , and a ridge length,  $d_s = 150 \mu\text{m}$  (Fig. S3 and S5). The first eight and nine ridges arranged in order of decreasing widths by 5  $\mu\text{m}$  from the initial width of 640  $\mu\text{m}$  were simulated.

## II. Supplemental Discussion

### Flow visualization

Visualization of flow patterns was performed using streak images of 1- $\mu\text{m}$  diameter fluorescent polystyrene beads in the device with  $\theta_s = 20^\circ$ . Flow visualization with 1- $\mu\text{m}$  particles revealed that the geometry-driven flow circulation was induced and composed mainly of two oppositely flowing currents (Fig. S1). Above the top surface of the ridges, the flow circulates from the sorting/gutter side to the focusing side, while within the trenches, the flow circulates in the opposite direction towards the gutter side. This flow pattern directs cell rolling from the sorting ridges to the channel floor and out towards the gutter (Fig. 2A).

### Sorting efficiency ( $\eta_s$ ) dependence on ridge angles

Previous studies have shown that the degree of non-axial flow is maximized when the groove intersection angle  $\theta = 45^\circ$  and that it decreases with deviation from this angle.<sup>12</sup> Therefore, we investigated whether the sorting efficiency,  $\eta_s$  is influenced by change in the angle of the sorting ridges (SR),  $\theta_s$ . To conduct this experiment, we fabricated two different devices with  $\theta_s = 20^\circ$  and  $45^\circ$  (Fig. S3). We found that there was no significant difference between the devices over shear stresses ranged from 3 to 9  $\text{dyn/cm}^2$  (Fig. S7). In either case, the fluid flow caused the cells to flow in the lateral direction and come into contact with the SR. Once the target cells tethered on the SR, whether they sustained cell rolling was determined by shear stress, not  $\theta_s$  (Fig. S7).

### Effect of gravity on deterministic cell rolling

The motion of cells is under the influence of buoyant and gravitational forces as well as hydrodynamic forces. However, we estimate that gravitational forces are not significant in the device operation. The maximum fluid velocity through the grooved region is  $\sim 3.5 \text{ mm/s}$  for the sorting condition (Fig. S5). Assuming Stokes drag, a cell with a diameter of 11.7  $\mu\text{m}$  and a density of 1.05  $\text{g/cm}^3$  has a settling velocity of  $\sim 3.7 \mu\text{m/s}$  in water at 22  $^\circ\text{C}$ . The cell is estimated to settle down by a distance on the order of 100 nm under the influence of gravity while traversing a sorting ridge (or  $\sim 2.5 \mu\text{m}$  while traversing 25 ridges before tethering), which is small compared to the channel height of 62.6  $\mu\text{m}$ . The flow rate in the focusing channel is an order of magnitude higher, and gravitational effects are expected to be even smaller.

### Effect of inertial forces on deterministic cell rolling

To assess the influence of inertial forces on deterministic cell rolling, we examined the Reynolds number  $R = U_m C / \nu$  and particle Reynolds number  $R_p = U_m d^2 / \nu C$ , where  $U_m$  is the maximum flow velocity,  $d$  is the particle diameter,  $\nu$  is the kinematic viscosity, and  $C$  is a characteristic dimension (the gap size,  $h_g$ ). Since the device is parallelized with 20 channels, a 70  $\mu\text{L/min}$  injection rate for the sorting corresponds to a flow rate of 3.5  $\mu\text{L/min}$  in each channel. For this sorting condition, the above equations yield  $R = 0.09$  and  $R_p = 0.02$  for the sorting channel, and  $R = 1.12$  and  $R_p = 0.2$  for the focusing channel. Inertial forces dominate particle motion at  $R_p$  of order 1.<sup>S3</sup> Due to the low  $R_p$  for the sorting channel, we can ignore the effect of inertial forces on deterministic cell rolling. In contrast, based on the high  $R_p$  and the small dimensions ( $a/h_g \sim 0.45$ ) of the focusing channel, inertial forces may have an influence on the focusing process<sup>S4</sup> and their effect should be further investigated for better understanding.

## Device design criteria

Deterministic cell rolling employs a complex flow pattern that results in cell sorting in the presence of cell rolling interactions. For deterministic cell rolling, the following two phenomena must occur under the same flow conditions and device geometry:

1. In the absence of cell rolling interactions, the cells must be focused by hydrophoresis.

For the cells to be focused by hydrophoresis, the channel dimensions should satisfy the following design guidelines: If the cell has a diameter  $d$ , the gap size ( $h_g$ ) should typically be in  $d < h_g < 2.5d$  and the total channel height ( $h_t$ ) should satisfy  $2h_g < h_t$ .<sup>16</sup> Stated in terms of the trench depth ( $h_r$ ), the latter implies  $h_g < h_r$ . The first condition states that the gap must be greater than the cell diameter (to prevent clogging), but not so large that the cells will follow individual streamlines. This part can be appreciated by considering the streamlines shown in Fig. S5C, bottom panel. When a cell approaches the focusing region, the streamline that it follows enters into the trench. However, the cell is displaced into another streamline above it, and thus keeps out of the trench. The displacement is proportional to the cell radius; a point particle will just follow the streamline into the trench and go towards the sorting side. At the next ridge, the cell is further displaced into another streamline above the present one, and so on. Thus, the cell must have a certain minimum size in order to stay focused by hydrophoresis. The second criterion states that the trench must have sufficient depth to create a circulating flow pattern. In addition, the trench angle cannot be too close to  $0^\circ$  or  $90^\circ$  for the circulation patterns to be created.

2. In the presence of cell rolling interactions, cells must be deflected into the trenches and sorted to the gutter side.

Due to the nature of the streamlines near the focusing side, we hypothesize that cells will be directed into the trench as long as conditions for stable rolling are maintained. Shear stress on the order of  $0.1\text{--}10\text{ dyn/cm}^2$  can typically support stable rolling of cells on selectins; therefore, the flow rate must be set to achieve this range of shear stresses. In addition, the trench must be deep enough and wide enough to allow the cell to roll in it towards the sorting side, i.e.  $d < h_r$ , and  $d < g_s \sin\theta$ , where  $g_s$  is the groove spacing, and  $g_s \sin\theta$  is the width of the trench (see Fig. S3). Prior studies on cell rolling suggest that the area of contact is typically in the range of  $5\text{ to }10\text{ }\mu\text{m}$ .<sup>55</sup> To ensure the stable tethering of cells, the length ( $d_s$ ) of the sorting ridges should be larger than  $10\text{ }\mu\text{m}$ . We set  $d_s$  to  $150\text{ }\mu\text{m}$  for stable tethering of multiple cells without interference of each other. We also set the groove spacing ( $g_s$ ) to the same dimension with  $d_s$  so that multiple cells can roll in the trench without significant cell-cell interactions.

## Application of deterministic cell rolling to other systems

To develop deterministic cell rolling as a new technique for cell separation, we chose a robust and well-characterized system of HL60 cells rolling on P-selectin to verify the principle. Hematopoietic stem and progenitor cells have been studied for their specific separation by CD34-mediated rolling adhesion on P-selectin.<sup>9</sup> Myung et al. have shown that MCF7 cells, human breast cancer cells exhibit specific rolling adhesion on E-selectin mediated by CD24.<sup>10</sup> Several other receptor-ligand pairs are known to support cell rolling, including molecules expressed on non-mammalian cells. While we anticipate that deterministic cell rolling will be extended to these and other cell types, new applications will need to be developed on a case-by-case basis due to the need to tailor the surfaces to ensure cell rolling. In cases where a specific affinity molecule that supports rolling is not available, tailoring of the surface may require selection or identification of low-affinity adhesion molecules, other lectins, or co-immobilization of antibodies with selectins.<sup>56</sup> Cells may also potentially be modified by labeling them with molecules that facilitate cell rolling<sup>23</sup> or by expressing such molecules on the cell surface. These approaches could potentially enable deterministic cell rolling to be extended to other cell systems of practical interest.

## III. Supplemental Figures

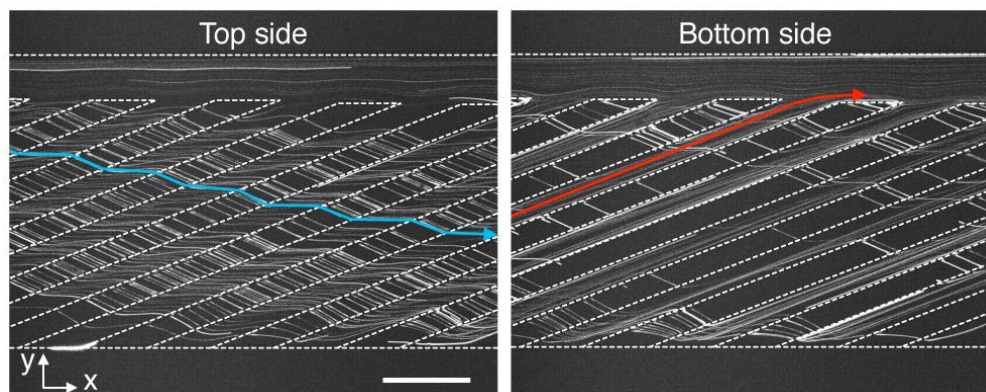

**Fig. S1** Flow visualization of the sorting channel with  $1\text{-}\mu\text{m}$  fluorescent beads. The fluorescence images show the rotational pattern of the flow streams in a clockwise direction as viewed from the  $x$ -axis. Scale bar,  $200\text{ }\mu\text{m}$ .

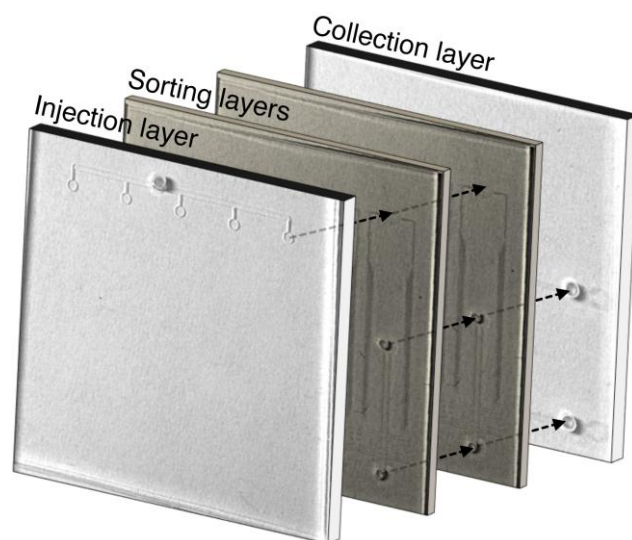

**Fig. S2** The four PDMS layers (an injection layer, two sorting layers, and a collection layer) were aligned and assembled together after their exposure to oxygen plasma for 40 s. The photographs were three-dimensionally reconstructed for better illustration.

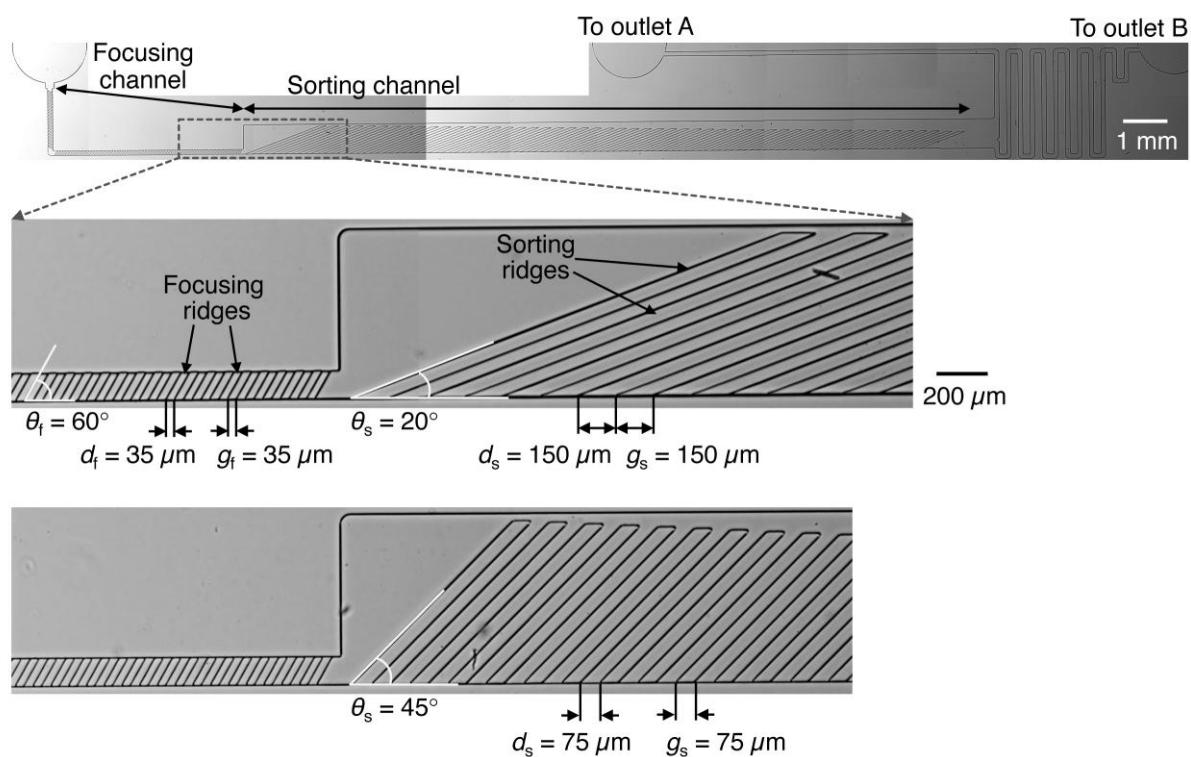

**Fig. S3** Geometry of a single microfluidic channel comprising the narrow focusing channel and the wide sorting channel. The pressure dump channels (100  $\mu\text{m}$  in width) are connected at the end of the sorting channel so that most of the pressure drop occurs through them. Thereby, the dump channels maintain a uniform flow distribution at each outlet junction in the parallel channel circuit.

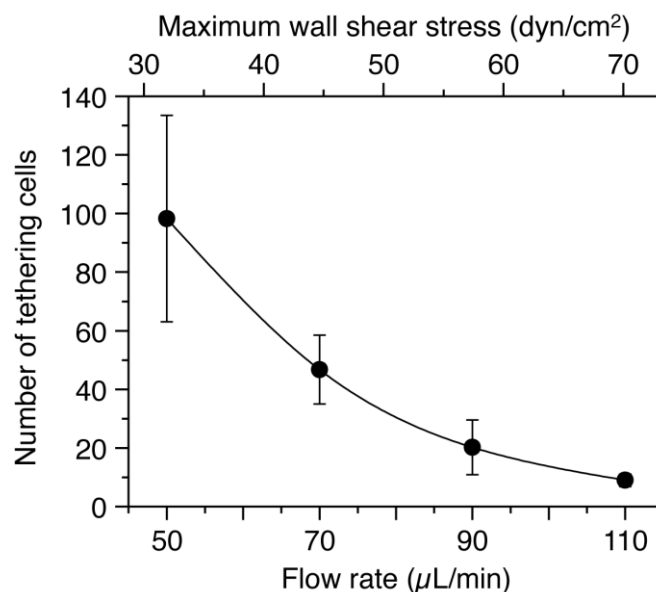

**Fig. S4** Adhesion of HL60 cells in the focusing channel. HL60 cells rolling in the focusing channel under steady state were counted from the images taken with a long exposure time where flowing cells could not be observed. Some HL60 cells could tether on the focusing ridges even at the high shear stresses over  $30 \text{ dyn}/\text{cm}^2$  but could not sustain rolling. The flow rate of the cells being introduced into the channel was  $\sim 100$  to  $220 \text{ cells}/\text{s}$ . No channel clogging by the rolling cells was observed during separation. Error bars, s.d. ( $n = 3$ ).



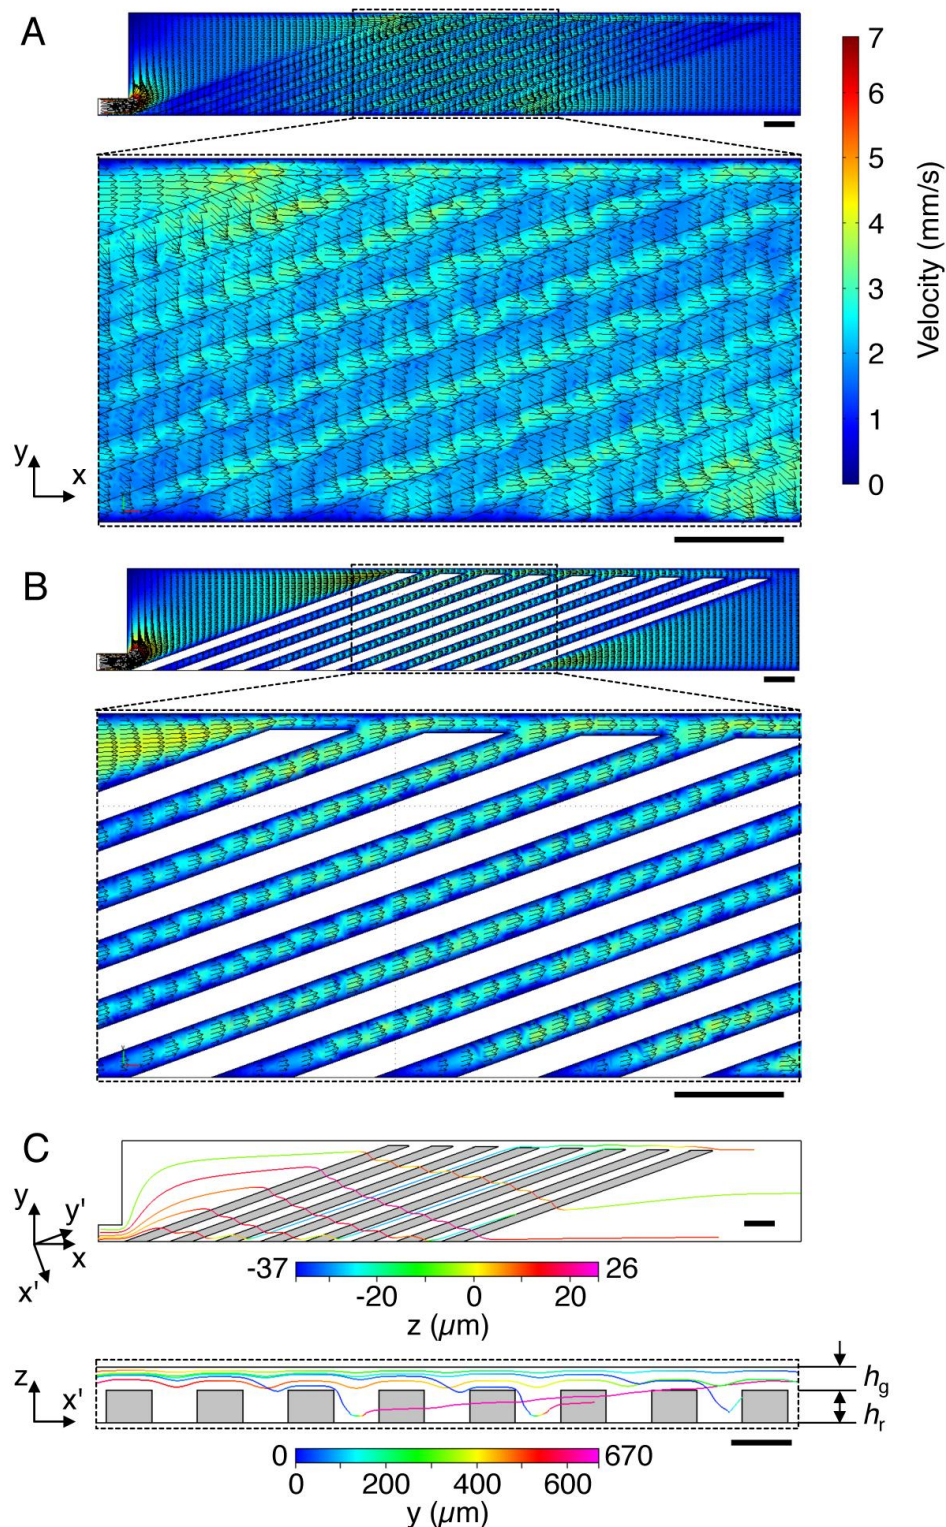

**Fig. S5** Flow simulations. (A,B) Simulated velocity fields and vectors on  $xy$  cross-sections at positions of  $z = 13 \mu\text{m}$  (A) and  $z = -18 \mu\text{m}$  (B), where the top surface of the sorting ridge was set to  $z = 0 \mu\text{m}$ . Above the top surface of the ridges, the flow circulates from the sorting/gutter side to the focusing side, while within the trenches, the flow circulates in the opposite direction towards the sorting/gutter side. (C) Simulated streamlines over the sorting ridges. The side view image shows the streamlines projected along the sorting ridges,  $y'$ -axis. The color coding is used to denote the out-of-plane position of the streamlines. Numerical simulations suggest that the flow streamlines are expected to be similar at the corner of the square post in Fig. 2C and the corner of the ridge. The gray regions denote the sorting ridges.  $h_r$  is the height of the SR.  $h_g$  is the gap between the top surfaces of the SR and the channel ceiling. Scale bars in A, B, and C, top, 200  $\mu\text{m}$ . Scale bar in C, bottom, 60  $\mu\text{m}$ .

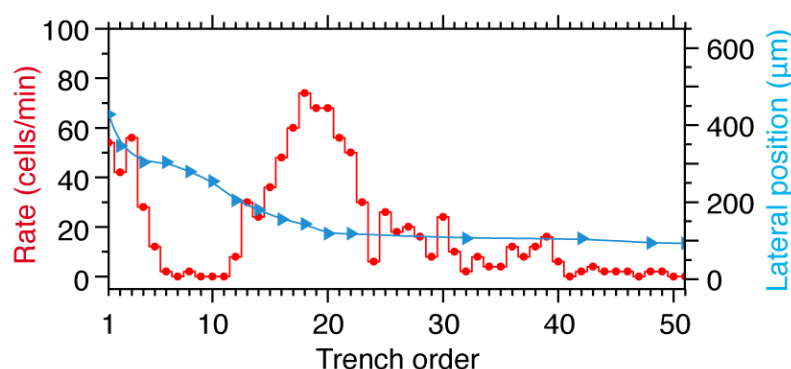

**Fig. S6** Number of rolling HL60 cells exiting each trench (counted per min) in the P-selectin-coated device (see Fig. 3B). Mean lateral positions of the HL60 cells in the BSA-passivated channel at each trench in Fig. 3A are also shown (blue triangles).

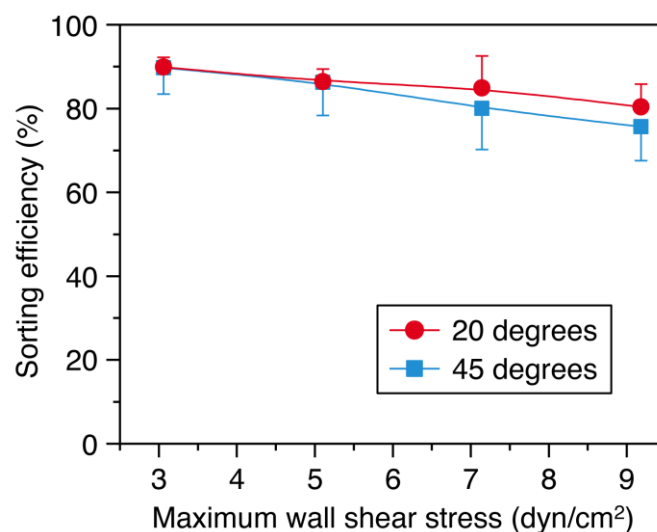

**Fig. S7** Effect of the angle of the sorting ridge,  $\theta_s$  and shear stress intensity on the sorting efficiencies of HL60. There is no observable variation of the sorting efficiency of HL60 cells with change in the sorting ridge angle. Error bars, s.d. ( $n = 3$ ).

## IV. Video Captions

**Video S1** Deterministic cell rolling of HL60 cells at  $\sigma = 3.4 \text{ dyn/cm}^2$  and  $c_p = 1.5 \text{ μg/mL}$ . This video is shown in real time and describes the rolling sequence of two HL60 cells in order of (1) tethering, (2) rolling on the vertical wall, (3) rolling on the bottom wall, and (4) detaching.

**Video S2** Sorting of HL60 (red) and K562 (green) cells at  $\sigma = 3.4 \text{ dyn/cm}^2$  and  $c_p = 1.5 \text{ μg/mL}$ . This video is shown in real time.

## V. References

- S1 C. J. Morris and F. K. Forster, *Exp. Fluids*, 2004, **36**, 928.
- S2 S. Hong, D. Lee, H. Zhang, J. Q. Zhang, J. N. Resvick, A. Khademhosseini, M. R. King, R. Langer and J. M. Karp, *Langmuir*, 2007, **23**, 12261.
- S3 D. D. Carlo, D. Irimia, R. G. Tompkins and M. Toner, *Proc. Natl. Acad. Sci. U. S. A.*, 2007, **104**, 18892.
- S4 W. Mao and A. Alexeev, *Phys. Fluids*, 2011, **23**, 051704.
- S5 C. Dong and X. X. Lei, *J. Biomech.*, 2000, **33**, 35.
- S6 J. H. Myung, C. A. Launiere, D. T. Eddington and S. Hong, *Langmuir*, 2010, **26**, 8589.
